# Supplementary material
Source: MDPI journal article supplement (https://www.mdpi.com/2073-431X/10/8/92)
Supplement: s1 [file s1]

**Table S1.** Overview of the operational elements of the proposed AR-supported LA system.

| Section    | Category      | Classification            | Values              | Objectives                                                                                    | Input                | Analysis              |            | Visualisation | Stakeholders                                    |
|------------|---------------|---------------------------|---------------------|-----------------------------------------------------------------------------------------------|----------------------|-----------------------|------------|---------------|-------------------------------------------------|
|            |               |                           |                     |                                                                                               | Machine              | Human                 | LA Machine | LMS           | D = Developers<br>E = Educators<br>S = Students |
| Technology | Apparatus     | General Purpose Equipment | Desktop PC          | System Usability                                                                              | System-log           | -                     | Statistics | Graph         | D                                               |
|            |               |                           | Laptop              |                                                                                               |                      |                       |            | Statistical   |                                                 |
|            | AR Equipment  | Wearables                 | Tablet              | User Experience                                                                               | Sensed               | -                     | ML / EDM   | Timeline      | E, D                                            |
|            |               |                           | Smartphone          |                                                                                               |                      |                       |            | Word cloud    |                                                 |
|            |               |                           | Internet Speed      |                                                                                               |                      |                       |            | Matrix        |                                                 |
|            |               | Augmentation Method       | AR Lenses / Glasses |                                                                                               | Mobile Communication | -                     | Statistics | Circular      | E, D                                            |
|            |               |                           | Smartwatch          |                                                                                               |                      |                       |            | Graph         |                                                 |
|            |               |                           | Headset / EarPods   |                                                                                               |                      |                       |            | Bubble plot   |                                                 |
| Pedagogy   | Discipline    | Field                     | Physical Objects    | -                                                                                             | System               | -                     | Statistics | Concept map   | E                                               |
|            |               |                           | Pointers / Markers  |                                                                                               |                      |                       |            | Glyph         |                                                 |
|            | Intervention  | Tasks                     | Tabletop            | Knowledge & Skills Comprehension<br>Understanding Enhancement<br>Knowledge / Skills Retention | Camera Transaction   | Educational Resources | ML / EDM   | Geomap        | E, S                                            |
|            |               |                           | Computer Science    |                                                                                               |                      |                       |            | Statistical   |                                                 |
|            |               |                           | Info. Technology    |                                                                                               |                      |                       |            | Graph         |                                                 |
|            |               |                           | Engineering         |                                                                                               |                      |                       |            | Heatmap       |                                                 |
| Psychology | Psychometrics | Motivation                | Mathematics         | Progress Monitoring                                                                           | LMS-log              | Educational Resources | ML / EDM   | Radar         | E, S                                            |
|            |               |                           | Observation         |                                                                                               |                      |                       |            | Timeline      |                                                 |
|            | Multimodal    | Engagement                | Problem Solving     | Satisfaction                                                                                  | LMS-log              | Administrative        | Statistics | Word cloud    | E                                               |
|            |               |                           | Experimentation     |                                                                                               |                      |                       |            | Glyph         |                                                 |
|            |               |                           | Content Creation    |                                                                                               |                      |                       |            | Statistical   |                                                 |
|            |               |                           | Formative           |                                                                                               |                      |                       |            | Heatmap       |                                                 |
| Psychology | Psychometrics | Motivation                | Summative           | Intention to use AR                                                                           | Sensed               | -                     | ML / EDM   | Timeline      | E                                               |
|            |               |                           | Survey              |                                                                                               |                      |                       |            | Bubble plot   |                                                 |
|            | Multimodal    | Engagement                | Eye Tracking        | Intention to use AR                                                                           | Sensed               | -                     | ML / EDM   | Heatmap       | E                                               |
|            |               |                           | Facial Expressions  |                                                                                               |                      |                       |            | Timeline      |                                                 |
|            |               |                           | Gesture Tracking    |                                                                                               |                      |                       |            | Bubble plot   |                                                 |
|            |               |                           | Noise Levels        |                                                                                               |                      |                       |            | Heatmap       |                                                 |
