# Supplementary material
Source: MDPI journal article supplement (https://www.mdpi.com/2073-431X/10/8/92)
Supplement: s1 [file s1]

Archive with 1 entries (1 files):
- computers-1285656-supplementary.pdf
